# Supplementary material for: Functionalization of BaTiO3 nanoparticles with electron insulating and conducting organophosphazene-based hybrid materials
Source: Royal Society of Chemistry journal article supplement (doi:10.1039/c7ra02186k), 2017-01-01
Supplement: c7ra02186k1.pdf [file c7ra02186k1.pdf]

## Supporting Information

### Functionalization of BaTiO<sub>3</sub> Nanoparticles with Electron Insulating and Conducting Organophosphazene-based Hybrid Materials

George S. Pappas<sup>1</sup>, Chaoying Wan<sup>1\*</sup>, Chris Bowen<sup>2</sup>, David M. Haddleton<sup>3</sup>, Xiaobin Huang<sup>4</sup>

<sup>1</sup>International Institute for Nanocomposites Manufacturing (IINM), WMG, University of Warwick, CV4 7AL, UK, <sup>2</sup>Materials and Structures Centre, Department of Mechanical Engineering, University of Bath, BA2 7AY, UK, <sup>3</sup>Department of Chemistry, University of Warwick, CV4 7AL, Coventry, UK, <sup>4</sup>School of Aeronautics and Astronautics, Shanghai Jiao Tong University, 200240, P. R. China

**Table S1.** Concentrations of BPS, HCCP and BaTiO<sub>3</sub> for forming OPZ@BaTiO<sub>3</sub>

| Sample name<br>[Shell@Core]  | BaTiO <sub>3</sub> to<br>monomers<br>weight ratio | BPS<br>(mg/ml) | HCCP<br>(mg/ml) | BaTiO <sub>3</sub><br>(mg/ml) |
|------------------------------|---------------------------------------------------|----------------|-----------------|-------------------------------|
| OPZ@BaTiO <sub>3</sub> -0.25 | 0.25:1                                            | 0.81           | 0.36            | 4.65                          |
| OPZ@BaTiO <sub>3</sub> -0.5  | 0.5:1                                             | 1.45           | 0.64            | 4.15                          |
| OPZ@BaTiO <sub>3</sub> -1    | 1.33:1                                            | 1.39           | 0.61            | 1.50                          |
| OPZ@BaTiO <sub>3</sub> -4    | 4:1                                               | 4.17           | 1.83            | 1.50                          |
| OPZ nanospheres              | -                                                 | 1.13           | 2.57            | -                             |

**Table S2.** Weight percentages as calculated from EDS analysis.

| Sample                       | C        | O    | S   | P   | N   | Cl  | Ba   | Ti   |
|------------------------------|----------|------|-----|-----|-----|-----|------|------|
|                              | weight % |      |     |     |     |     |      |      |
| OPZ@BaTiO <sub>3</sub> -0.25 | 9.4      | 19.2 | 1.0 | 1.3 | 0.3 | 0.5 | 51.0 | 17.3 |
| OPZ@BaTiO <sub>3</sub> -0.5  | 20.0     | 25.5 | 1.8 | 2.1 | 0.5 | 0.6 | 39.1 | 13.5 |
| OPZ@BaTiO <sub>3</sub> -1    | 25.1     | 31.9 | 2.1 | 2.8 | 1.4 | 1.3 | 26.5 | 8.9  |
| OPZ@BaTiO <sub>3</sub> -4    | 36.0     | 18.5 | 4.1 | 4.6 | 3.8 | 1.3 | 24.6 | 7.0  |
| C@BaTiO <sub>3</sub> -0.25   | 2.7      | 6.7  | 0.3 | 1.3 | 0.1 | 0.2 | 65.5 | 23.4 |
| C@BaTiO <sub>3</sub> -0.5    | 4.8      | 6.6  | 0.3 | 1.2 | 0   | 0.2 | 56.5 | 20.3 |
| C@BaTiO <sub>3</sub> -1      | 29.0     | 16.7 | 1   | 5.5 | 0.4 | 0   | 36.0 | 10.7 |
| C@BaTiO <sub>3</sub> -4      | 54.6     | 14.0 | 2.1 | 8.5 | 4.1 | 0   | 12.6 | 4.1  |

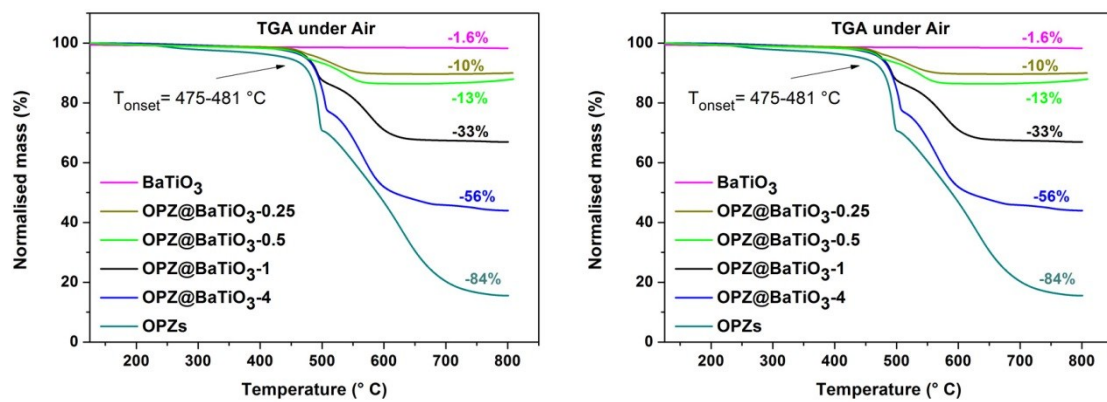

**Figure S1.** TGA curves under air of the a) OPZ@BaTiO<sub>3</sub> the bare BaTiO<sub>3</sub> nanoparticles and b) C@BaTiO<sub>3</sub>. The mass loss was calculated at the range 120-700°C.

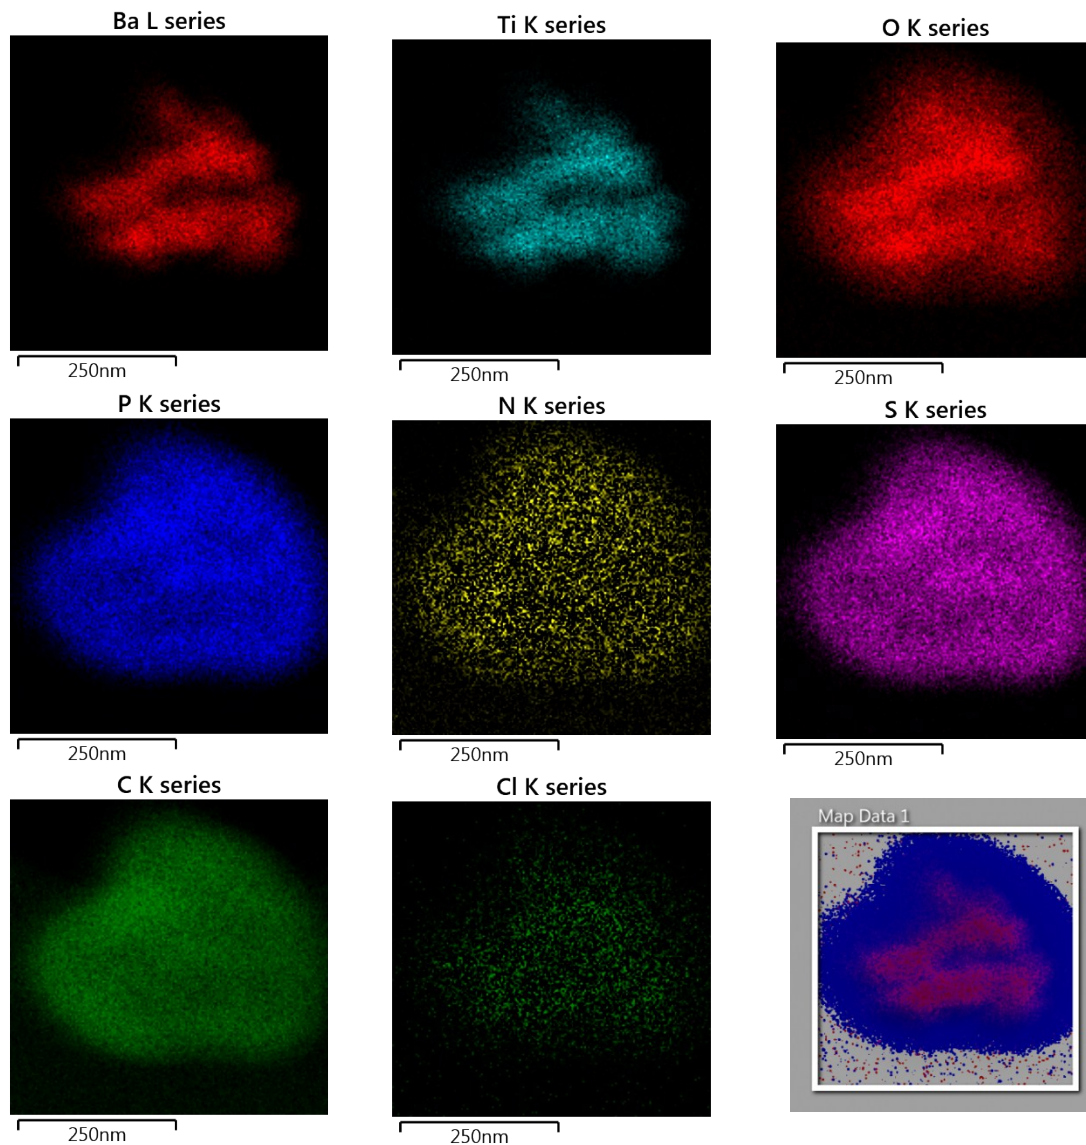

**Figure S2.** TEM-EDX elemental mapping of the OPZ@BaTiO<sub>3</sub>-4 a) individual mapping of all the elements and the overlay mapping of the Ba (core) and P (shell).

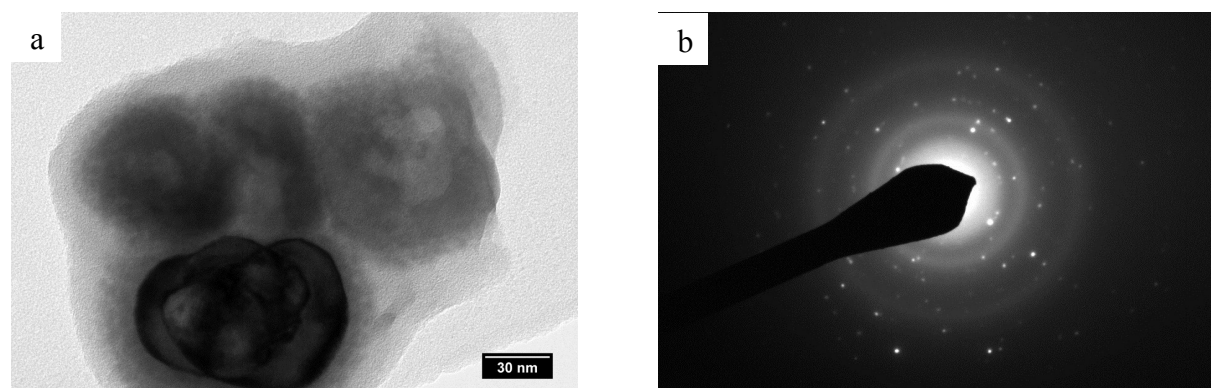

**Figure S3.** a) TEM micrograph of the C@BaTiO<sub>3</sub>-1 and b) the corresponding SAED pattern.

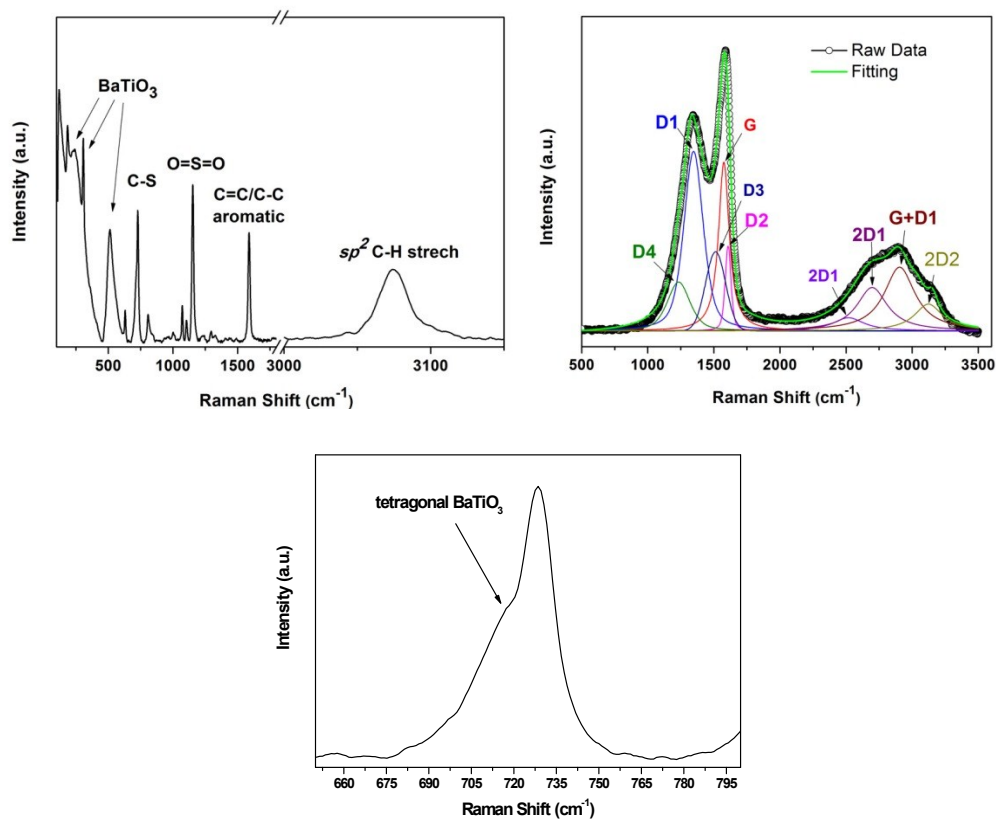

**Figure S4.** Characteristic Raman spectra of a) OPZs@BaTiO<sub>3</sub>-1 and b) C@BaTiO<sub>3</sub>-1, Raman spectra of the OPZ@BaTiO<sub>3</sub> highlighting the presence of the tetragonal structure of BaTiO<sub>3</sub>.

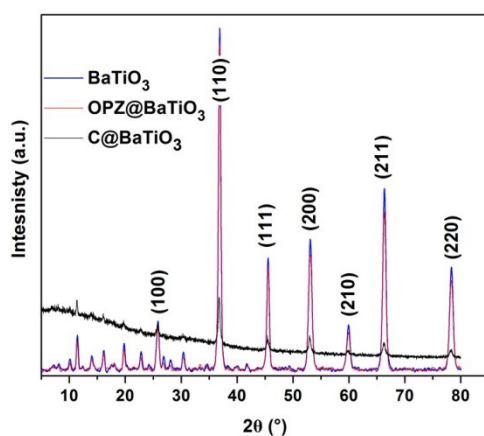

**Figure S5.** XRD patterns of BaTiO<sub>3</sub>, OPZ@BaTiO<sub>3</sub> and C@BaTiO<sub>3</sub>.

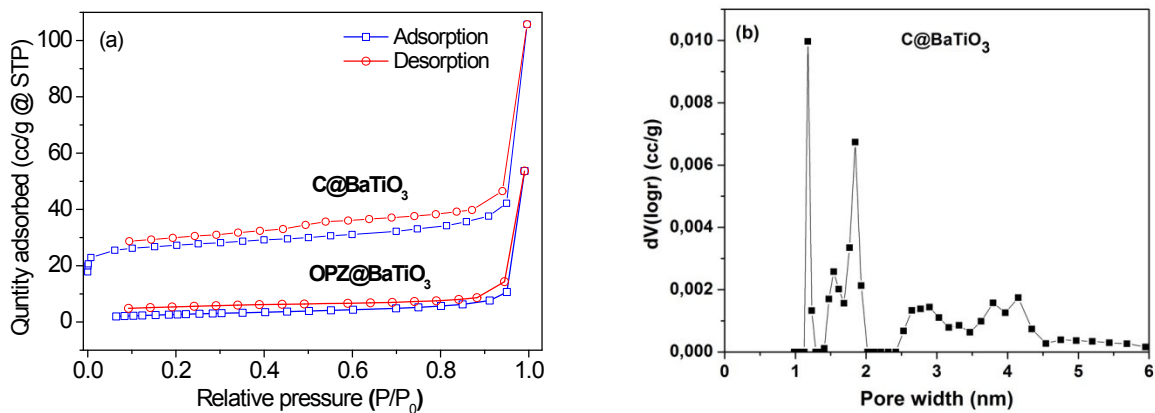

**Figure S6.** Representative a)  $N_2$  adsorption-desorption isotherms of the core-shell particles before and after carbonization and b) pore size distribution of the  $C@BaTiO_3$  samples based on NLDFT calculation.

**Table S3.** Textural properties of the samples calculated from N<sub>2</sub> sorption isotherms

| <b>Sample name</b><br>[Shell@Core] | Specific<br>surface area<br>m <sup>2</sup> /g | Micropore<br>area<br>m <sup>2</sup> /g |
|------------------------------------|-----------------------------------------------|----------------------------------------|
| OPZ@BaTiO <sub>3</sub> -0.25       | 34                                            | 0                                      |
| OPZ@BaTiO <sub>3</sub> -0.5        | 19                                            | 0                                      |
| OPZ@BaTiO <sub>3</sub> -1          | 10                                            | 0                                      |
| OPZ@BaTiO <sub>3</sub> -4          | 9                                             | 0                                      |
| C@BaTiO <sub>3</sub> -0.25         | 34                                            | 5                                      |
| C@BaTiO <sub>3</sub> -0.5          | 65                                            | 13                                     |
| C@BaTiO <sub>3</sub> -1            | 105                                           | 21                                     |
| C@BaTiO <sub>3</sub> -4            | 183                                           | 153                                    |

**Table S4.** Percentage atomic concentrations as calculated from high resolution XPS analysis

|                                | <i>C 1s</i> | <i>O 1s</i> | <i>S 2p</i> | <i>P 2p</i> | <i>N 1s</i> | <i>Cl 2p</i> | <i>Ba 3d</i> | <i>Ti 2p</i> |
|--------------------------------|-------------|-------------|-------------|-------------|-------------|--------------|--------------|--------------|
| <i>Sample</i>                  | atomic %    |             |             |             |             |              |              |              |
| <i>OPZ@BaTiO<sub>3</sub>-1</i> | 63.05       | 21.94       | 5.13        | 5.81        | 3.72        | 0.58         | 0.34         | 0.37         |
| <i>OPZ@BaTiO<sub>3</sub>-4</i> | 63.12       | 21.30       | 5.16        | 5.24        | 4.37        | 0.81         | -            | -            |
| <i>C@BaTiO<sub>3</sub>-1</i>   | 82.43       | 10.59       | 0.89        | 2.21        | 1.82        | -            | 1.71         | 0.35         |
| <i>C@BaTiO<sub>3</sub>-4</i>   | 82.93       | 9.86        | 1.24        | 3.01        | 2.69        | -            | 0.28         | -            |

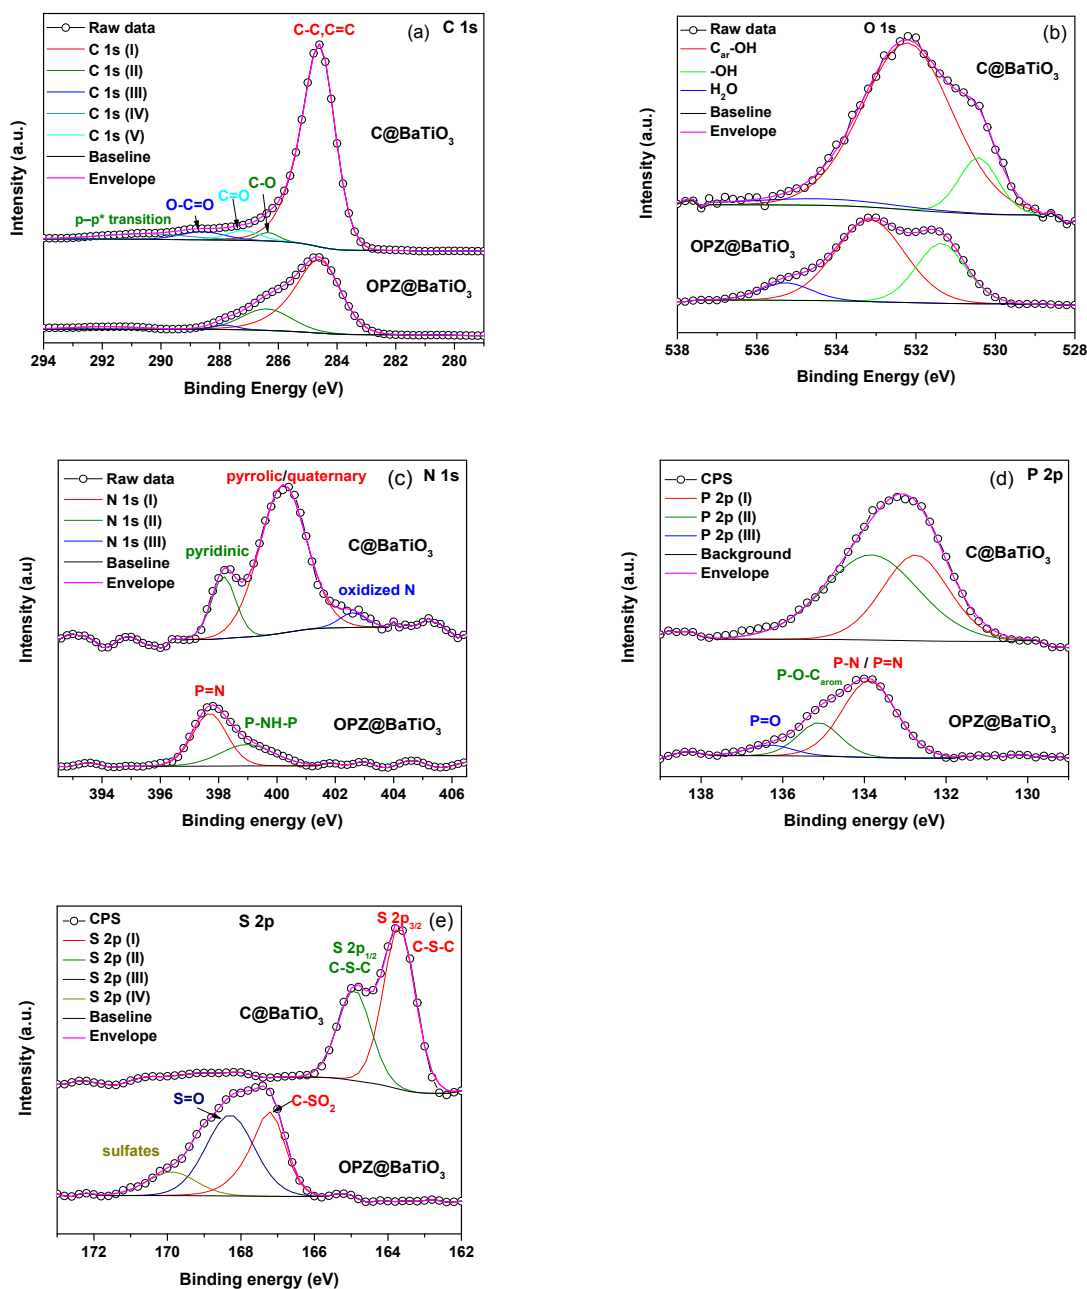

**Figure S7.** Core-level XPS scanning and deconvolution of the peaks of the core-shell particles before and after carbonization.

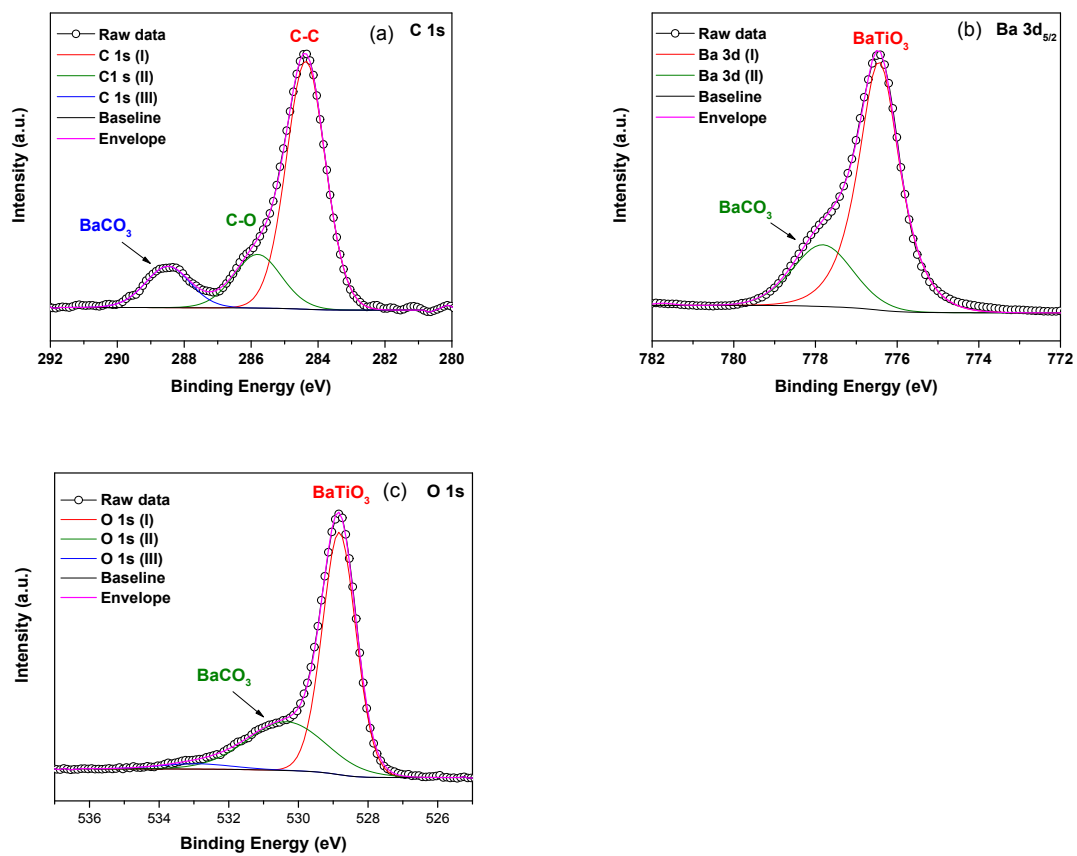

**Figure S8.** BaTiO<sub>3</sub> XPS core-level spectra of a) C 1s, b) Ba 3d<sub>5/2</sub> and c) O 1s indicating the presence of BaCO<sub>3</sub>
